# Supplementary material for: Predicting Catheter-Associated Urinary Tract Infections and Antibiotic Resistance in Hospitalized Dogs: Impact of Prior Antibiotic Treatment
Source: Preprints.org preprint supplement (doi:10.20944/preprints202408.1836.v1), 2024-08-26
Supplement: Supplementary file 1 [file supplementary]

**Table S1. Signalment and history**

| Number | Age(year) | Sex | Status | BW(kg) | Breed | Disease | Antibiotics |
| --- | --- | --- | --- | --- | --- | --- | --- |
| 1 | 5 | F | N | 9 | french bulldog | Closed pyometra, vector-borne diseases | AMC, doxycycline |
| 2 | 6 | F | I | 8.1 | french bulldog | Post-operative, pneumonia | Imipenem, metronidazole |
| 3 | 9 | F | I | 22.9 | thai bangkaew | Post-operative | AMC |
| 4 | 8 | F | N | 6.6 | crossbreed | Post-operative, pneumonia, pancreatitis | AMC, metronidazole |
| 5 | 9 | F | N | 17.8 | thai bangkaew | Vector-borne diseases, encephalitis | Doxycycline, marbofloxacin |
| 6 | 9 | F | N | 12.2 | crossbreed | Hepatic mass, acute kidney injury | AMC |
| 7 | 3 | F | N | 5.2 | poodle | Canine distemper virus infection | AMC, doxycycline |
| 8 | 7 | F | N | 23.1 | crossbreed | Diabetes mellitus, pancreatitis | AMC, metronidazole |
| 9 | 4 | F | I | 13 | welsh corgi | Post-operative | AMC, metronidazole |
| 10 | 11 | F | N | 13 | welsh corgi | Closed pyometra | AMC |
| 11 | 15 | F | N | 36.3 | crossbreed | Post-operative | Imipenem, sulfa-trimetroprim |
| 12 | 12 | F | N | 4.15 | crossbreed | Post-operative | AMC |
| 13 | 9 | F | N | 4.1 | chihuahua | Post-operative | AMC |
| 14 | 14 | F | N | 24.5 | golden retriever | Post-operative | AMC |
| 15 | 8 | F | N | 15.35 | crossbreed | Post-operative | AMC, azithromycin |
| 16 | 10 | F | N | 17.8 | thai bangkaew | Post-operative | Imipenem, metronidazole |
| 17 | 11 | F | N | 4 | pomeranian | Post-operative | AMC, azithromycin |
| 18 | 13 | F | N | 7.7 | shih tzu | Lymphoma, pneumonia | Imipenem, azithromycin |
| 19 | 12 | F | I | 5.5 | shih tzu | Pancreatitis, cholangiohepatitis, acute kidney injury | Imipenem, doxycycline |
| 20 | 10 | F | N | 23.2 | siberian husky | Hemorrhagic gastroenteritis | Imipenem, metronidazole, tylosin |
| 21 | 17 | F | N | 4.7 | poodle | Pancreatitis | Imipenem, metronidazole |
| 22 | 2 | F | N | 10.45 | french bulldog | Encephalitis | Imipenem, doxycycline |
| 23 | 8 | F | I | 25 | siberian husky | Pancreatitis, cholangiohepatitis | metronidazole, enrofloxacin |
| 24 | 10 | F | I | 10.7 | crossbreed | Diabetes mellitus, pancreatitis | Imipenem |
| 25 | 9 | F | N | 3.25 | pomeranian | Post-operative | AMC |
| 26 | 13 | M | I | 20 | crossbreed | Pancreatitis, acute kidney injury | Imipenem, metronidazole |
| 27 | 1 | M | I | 11.9 | crossbreed | Vector-borne diseases | doxycycline, clindamycin |
| 28 | 7 | M | N | 12.6 | french bulldog | Post-operative | AMC |
